# Supplementary material
Source: publisher site journal article supplement (https://www.spandidos-publications.com/7130/downloadSupplementary)
Supplement: Supplementary file 1 [file downloadSupplementary]

## Sheet: Sheet1
Table SVII. Signaling pathways based on KEGG enrichment analysis and functional terms from GO enrichment analysis for the Hyp group and the non-Hyp group.
A, Signaling pathways enriched in KEGG analysis of all somatic mutated genes in the Hyp group (n=16)
ID	Description	GeneRatio	BgRatio	P-value	p.adjust	q-value	Gene ID	Count
hsa05223	Non-small cell lung cancer	7/14	72/8157	1.01X10-11	1.26X10-9	6.18X10-10	EGFR/TP53/ERBB2/CDKN2A/RET/ALK/HRAS	7
hsa05219	Bladder cancer	6/14	41/8157	3.21X10-11	1.99X10-9	9.8X10-10	EGFR/TP53/ERBB2/CDKN2A/HRAS/FGFR3	6
hsa05230	Central carbon metabolism in cancer	6/14	70/8157	9.13X10-10	3.78X10-8	1.86X10-8	EGFR/TP53/ERBB2/RET/HRAS/FGFR3	6
hsa05213	Endometrial cancer	5/14	58/8157	2.91X10-8	9.01X10-7	4.44X10-7	EGFR/TP53/ERBB2/APC/HRAS	5
hsa05206	MicroRNAs in cancer	7/14	310/8157	2.92X10-7	7.24X10-6	3.57X10-6	EGFR/TP53/ERBB2/CDKN2A/APC/HRAS/FGFR3	7
hsa01522	Endocrine resistance	5/14	98/8157	4.15X10-7	8.58X10-6	4.22X10-6	EGFR/TP53/ERBB2/CDKN2A/HRAS	5
hsa05224	Breast cancer	5/14	147/8157	3.12X10-6	5.17X10-5	2.54X10-5	EGFR/TP53/ERBB2/APC/HRAS	5
hsa05226	Gastric cancer	5/14	149/8157	3.33X10-6	5.17X10-5	2.54X10-5	EGFR/TP53/ERBB2/APC/HRAS	5
hsa05218	Melanoma	4/14	72/8157	5.23X10-6	6.71X10-5	3.3X10-5	EGFR/TP53/CDKN2A/HRAS	4
hsa05225	Hepatocellular carcinoma	5/14	168/8157	6.01X10-6	6.71X10-5	3.3X10-5	EGFR/TP53/CDKN2A/APC/HRAS	5
hsa05214	Glioma	4/14	75/8157	6.16X10-6	6.71X10-5	3.3X10-5	EGFR/TP53/CDKN2A/HRAS	4
hsa05212	Pancreatic cancer	4/14	76/8157	6.49X10-6	6.71X10-5	3.3X10-5	EGFR/TP53/ERBB2/CDKN2A	4
hsa01521	EGFR tyrosine kinase inhibitor resistance	4/14	79/8157	7.58X10-6	7.23X10-5	3.56X10-5	EGFR/ERBB2/HRAS/FGFR3	4
hsa05210	Colorectal cancer	4/14	86/8157	1.06X10-5	9.42X10-5	4.64X10-5	EGFR/TP53/APC/HRAS	4
hsa05205	Proteoglycans in cancer	5/14	205/8157	1.59X10-5	0.000131379	6.47X10-5	EGFR/TP53/ERBB2/HRAS/SMO	5
hsa05215	Prostate cancer	4/14	97/8157	1.72X10-5	0.000133066	6.55X10-5	EGFR/TP53/ERBB2/HRAS	4
hsa05216	Thyroid cancer	3/14	37/8157	3.02X10-5	0.000220425	0.000108528	TP53/RET/HRAS	3
hsa04010	MAPK signaling pathway	5/14	294/8157	9.00X10-5	0.000620212	0.000305368	EGFR/TP53/ERBB2/HRAS/FGFR3	5
hsa05217	Basal cell carcinoma	3/14	63/8157	0.000150429	0.000981745	0.000483372	TP53/APC/SMO	3
hsa04151	PI3K-Akt signaling pathway	5/14	354/8157	0.000216575	0.00134276	0.000661123	EGFR/TP53/ERBB2/HRAS/FGFR3	5
hsa01524	Platinum drug resistance	3/14	73/8157	0.000233226	0.00137715	0.000678051	TP53/ERBB2/CDKN2A	3
hsa05220	Chronic myeloid leukemia	3/14	76/8157	0.000262814	0.00148132	0.000729341	TP53/CDKN2A/HRAS	3
hsa04012	ErbB signaling pathway	3/14	85/8157	0.000365892	0.00197263	0.000971246	EGFR/ERBB2/HRAS	3
hsa04810	Regulation of actin cytoskeleton	4/14	218/8157	0.000402357	0.00199827	0.000983868	EGFR/APC/HRAS/FGFR3	4
hsa04211	Longevity regulating pathway	3/14	89/8157	0.000418992	0.00199827	0.000983868	TP53/SOD2/HRAS	3
hsa05235	PD-L1 expression and PD-1 checkpoint pathway in cancer	3/14	89/8157	0.000418992	0.00199827	0.000983868	EGFR/ALK/HRAS	3
hsa05163	Human cytomegalovirus infection	4/14	225/8157	0.000453803	0.00208413	0.00102614	EGFR/TP53/CDKN2A/HRAS	4
hsa04020	Calcium signaling pathway	4/14	240/8157	0.000579737	0.0025674	0.00126409	EGFR/ERBB2/RET/FGFR3	4
hsa04068	FoxO signaling pathway	3/14	131/8157	0.00129448	0.00553503	0.00272523	EGFR/SOD2/HRAS	3
hsa04550	Signaling pathways regulating pluripotency of stem cells	3/14	143/8157	0.00166663	0.00688875	0.00339174	APC/HRAS/FGFR3	3
hsa05165	Human papillomavirus infection	4/14	331/8157	0.00192866	0.00771466	0.00379839	EGFR/TP53/APC/HRAS	4
hsa04934	Cushing syndrome	3/14	155/8157	0.00210011	0.00794538	0.00391199	EGFR/CDKN2A/APC	3
hsa04218	Cellular senescence	3/14	156/8157	0.00213912	0.00794538	0.00391199	TP53/CDKN2A/HRAS	3
hsa05160	Hepatitis C	3/14	157/8157	0.00217857	0.00794538	0.00391199	EGFR/TP53/HRAS	3
hsa04510	Focal adhesion	3/14	201/8157	0.00438992	0.0155529	0.0076576	EGFR/ERBB2/HRAS	3
hsa05203	Viral carcinogenesis	3/14	204/8157	0.00457645	0.0157633	0.00776123	TP53/CDKN2A/HRAS	3
hsa04213	Longevity regulating pathway - multiple species	2/14	62/8157	0.00487758	0.0161982	0.00797532	SOD2/HRAS	2
hsa04015	Rap1 signaling pathway	3/14	210/8157	0.00496395	0.0161982	0.00797532	EGFR/HRAS/FGFR3	3
hsa05207	Chemical carcinogenesis - receptor activation	3/14	212/8157	0.00509744	0.0162072	0.00797979	EGFR/HRAS/UGT1A1	3
hsa05417	Lipid and atherosclerosis	3/14	215/8157	0.00530175	0.0164354	0.00809215	TP53/SOD2/HRAS	3
hsa05166	Human T-cell leukemia virus 1 infection	3/14	222/8157	0.00579776	0.0173329	0.00853405	TP53/CDKN2A/HRAS	3
hsa05208	Chemical carcinogenesis - reactive oxygen species	3/14	223/8157	0.00587084	0.0173329	0.00853405	EGFR/SOD2/HRAS	3
hsa04520	Adherens junction	2/14	71/8157	0.00635347	0.0183082	0.00901422	EGFR/ERBB2	2
hsa04137	Mitophagy - animal	2/14	72/8157	0.0065286	0.0183082	0.00901422	TP53/HRAS	2
hsa04115	p53 signaling pathway	2/14	73/8157	0.00670594	0.0183082	0.00901422	TP53/CDKN2A	2
hsa04014	Ras signaling pathway	3/14	235/8157	0.00679175	0.0183082	0.00901422	EGFR/HRAS/FGFR3	3
hsa00980	Metabolism of xenobiotics by cytochrome P450	2/14	78/8157	0.00762541	0.0201181	0.00990535	CBR3/UGT1A1	2
hsa04144	Endocytosis	3/14	251/8157	0.00814846	0.0210502	0.0103643	EGFR/HRAS/FGFR3	3
hsa04540	Gap junction	2/14	88/8157	0.00962562	0.0243587	0.0119933	EGFR/HRAS	2
hsa04912	GnRH signaling pathway	2/14	93/8157	0.0107047	0.0265476	0.013071	EGFR/HRAS	2
hsa05231	Choline metabolism in cancer	2/14	98/8157	0.0118352	0.0287758	0.014168	EGFR/HRAS	2
hsa04066	HIF-1 signaling pathway	2/14	109/8157	0.0144996	0.0345759	0.0170238	EGFR/ERBB2	2
hsa04071	Sphingolipid signaling pathway	2/14	119/8157	0.0171272	0.0393292	0.0193641	TP53/HRAS	2
hsa04722	Neurotrophin signaling pathway	2/14	119/8157	0.0171272	0.0393292	0.0193641	TP53/HRAS	2
hsa04919	Thyroid hormone signaling pathway	2/14	121/8157	0.0176757	0.0398506	0.0196208	TP53/HRAS	2
hsa04110	Cell cycle	2/14	126/8157	0.0190795	0.0422475	0.020801	TP53/CDKN2A	2
hsa04926	Relaxin signaling pathway	2/14	129/8157	0.0199441	0.0433871	0.0213621	EGFR/HRAS	2
hsa04210	Apoptosis	2/14	136/8157	0.022025	0.047088	0.0231842	TP53/HRAS	2
hsa04915	Estrogen signaling pathway	2/14	138/8157	0.0226357	0.0475734	0.0234233	EGFR/HRAS	2
B, Signaling pathways enriched in KEGG analysis of all somatic mutated genes in the non-Hyp group (n=48)
ID	Description	GeneRatio	BgRatio	P-value	p.adjust	q-value	Gene ID	Count
hsa05230	Central carbon metabolism in cancer	12/26	70/8157	5.21X10-19	9.18X10-17	3.62X10-17	EGFR/TP53/PIK3CA/KIT/FGFR2/NTRK1/KRAS/FGFR3/ERBB2/MAP2K1/PDGFRA/RET	12
hsa01522	Endocrine resistance	12/26	98/8157	3.81X10-17	3.35X10-15	1.32X10-15	EGFR/TP53/PIK3CA/ESR1/RB1/KRAS/BRAF/NOTCH1/CYP2D6/ERBB2/MAP2K1/GNAS	12
hsa05224	Breast cancer	13/26	147/8157	1.05X10-16	6.17X10-15	2.44X10-15	EGFR/TP53/PIK3CA/ESR1/KIT/APC/RB1/KRAS/BRAF/NOTCH1/CTNNB1/ERBB2/MAP2K1	13
hsa05215	Prostate cancer	11/26	97/8157	2.51X10-15	1.10X10-13	4.36X10-14	EGFR/TP53/PIK3CA/FGFR2/RB1/KRAS/BRAF/CTNNB1/ERBB2/MAP2K1/PDGFRA	11
hsa05223	Non-small cell lung cancer	10/26	72/8157	7.13X10-15	2.51X10-13	9.91X10-14	EGFR/TP53/PIK3CA/RB1/KRAS/BRAF/ERBB2/MAP2K1/RET/ALK	10
hsa05213	Endometrial cancer	9/26	58/8157	6.92X10-14	2.03X10-12	8.01X10-13	EGFR/TP53/PIK3CA/APC/KRAS/BRAF/CTNNB1/ERBB2/MAP2K1	9
hsa05219	Bladder cancer	8/26	41/8157	2.89X10-13	7X10-12	2.76X10-12	EGFR/TP53/RB1/KRAS/BRAF/FGFR3/ERBB2/MAP2K1	8
hsa05226	Gastric cancer	11/26	149/8157	3.18X10-13	7X10-12	2.76X10-12	EGFR/TP53/PIK3CA/APC/FGFR2/RB1/KRAS/BRAF/CTNNB1/ERBB2/MAP2K1	11
hsa01521	EGFR tyrosine kinase inhibitor resistance	9/26	79/8157	1.28X10-12	2.51X10-11	9.92X10-12	EGFR/PIK3CA/FGFR2/KRAS/BRAF/FGFR3/ERBB2/MAP2K1/PDGFRA	9
hsa04151	PI3K-Akt signaling pathway	13/26	354/8157	9.72X10-12	1.71X10-10	6.75X10-11	EGFR/TP53/PIK3CA/NOS3/KIT/FGFR2/NTRK1/KRAS/FGFR3/ERBB2/MAP2K1/STK11/PDGFRA	13
hsa05216	Thyroid cancer	7/26	37/8157	1.34X10-11	2.05X10-10	8.09X10-11	TP53/NTRK1/KRAS/BRAF/CTNNB1/MAP2K1/RET	7
hsa04015	Rap1 signaling pathway	11/26	210/8157	1.4X10-11	2.05X10-10	8.09X10-11	EGFR/PIK3CA/KIT/FGFR2/KRAS/BRAF/CTNNB1/FGFR3/MAP2K1/PDGFRA/GNAS	11
hsa05218	Melanoma	8/26	72/8157	3.4X10-11	4.61X10-10	1.82X10-10	EGFR/TP53/PIK3CA/RB1/KRAS/BRAF/MAP2K1/PDGFRA	8
hsa05214	Glioma	8/26	75/8157	4.77X10-11	5.99X10-10	2.37X10-10	EGFR/TP53/PIK3CA/RB1/KRAS/BRAF/MAP2K1/PDGFRA	8
hsa05212	Pancreatic cancer	8/26	76/8157	5.32X10-11	6.24X10-10	2.46X10-10	EGFR/TP53/PIK3CA/RB1/KRAS/BRAF/ERBB2/MAP2K1	8
hsa05210	Colorectal cancer	8/26	86/8157	1.47X10-10	1.61X10-9	6.37X10-10	EGFR/TP53/PIK3CA/APC/KRAS/BRAF/CTNNB1/MAP2K1	8
hsa04010	MAPK signaling pathway	11/26	294/8157	5.28X10-10	5.47X10-9	2.16X10-9	EGFR/TP53/KIT/FGFR2/NTRK1/KRAS/BRAF/FGFR3/ERBB2/MAP2K1/PDGFRA	11
hsa05225	Hepatocellular carcinoma	9/26	168/8157	1.25X10-9	1.22X10-8	4.81X10-9	EGFR/TP53/PIK3CA/APC/RB1/KRAS/BRAF/CTNNB1/MAP2K1	9
hsa05205	Proteoglycans in cancer	9/26	205/8157	7.24X10-9	6.71X10-8	2.65X10-8	EGFR/TP53/PIK3CA/ESR1/KRAS/BRAF/CTNNB1/ERBB2/MAP2K1	9
hsa04810	Regulation of actin cytoskeleton	9/26	218/8157	1.24X10-8	1.09X10-7	4.31X10-8	EGFR/PIK3CA/APC/FGFR2/KRAS/BRAF/FGFR3/MAP2K1/PDGFRA	9
hsa05163	Human cytomegalovirus infection	9/26	225/8157	1.64X10-8	1.35X10-7	5.31X10-8	EGFR/TP53/PIK3CA/RB1/KRAS/CTNNB1/MAP2K1/PDGFRA/GNAS	9
hsa05206	MicroRNAs in cancer	10/26	310/8157	1.68X10-8	1.35X10-7	5.31X10-8	EGFR/TP53/PIK3CA/APC/KRAS/NOTCH1/FGFR3/ERBB2/MAP2K1/PDGFRA	10
hsa05160	Hepatitis C	8/26	157/8157	1.83X10-8	1.4X10-7	5.54X10-8	EGFR/TP53/PIK3CA/RB1/KRAS/BRAF/CTNNB1/MAP2K1	8
hsa04014	Ras signaling pathway	9/26	235/8157	2.39X10-8	1.75X10-7	6.92X10-8	EGFR/PIK3CA/KIT/FGFR2/NTRK1/KRAS/FGFR3/MAP2K1/PDGFRA	9
hsa04020	Calcium signaling pathway	9/26	240/8157	2.87X10-8	2.02X10-7	7.98X10-8	EGFR/NOS3/FGFR2/NTRK1/FGFR3/ERBB2/PDGFRA/GNAS/RET	9
hsa05165	Human papillomavirus infection	10/26	331/8157	3.15X10-8	2.13X10-07	8.41X10-8	EGFR/TP53/PIK3CA/APC/RB1/KRAS/NOTCH1/CTNNB1/MAP2K1/GNAS	10
hsa04919	Thyroid hormone signaling pathway	7/26	121/8157	6.91X10-8	4.51X10-7	1.78X10-7	TP53/PIK3CA/ESR1/KRAS/NOTCH1/CTNNB1/MAP2K1	7
hsa05220	Chronic myeloid leukemia	6/26	76/8157	1.06X10-7	6.68X10-7	2.64X10-7	TP53/PIK3CA/RB1/KRAS/BRAF/MAP2K1	6
hsa04068	FoxO signaling pathway	7/26	131/8157	1.2X10-7	7.26X10-7	2.87X10-7	EGFR/PIK3CA/SOD2/KRAS/BRAF/MAP2K1/STK11	7
hsa04915	Estrogen signaling pathway	7/26	138/8157	1.71X10-7	1X10-6	3.97X10-7	EGFR/PIK3CA/ESR1/NOS3/KRAS/MAP2K1/GNAS	7
hsa04012	ErbB signaling pathway	6/26	85/8157	2.09X10-7	1.18X10-6	4.68X10-7	EGFR/PIK3CA/KRAS/BRAF/ERBB2/MAP2K1	6
hsa04550	Signaling pathways regulating pluripotency of stem cells	7/26	143/8157	2.19X10-7	1.2X10-6	4.75X10-7	PIK3CA/APC/FGFR2/KRAS/CTNNB1/FGFR3/MAP2K1	7
hsa04072	Phospholipase D signaling pathway	7/26	148/8157	2.77X10-7	1.48X10-6	5.83X10-7	EGFR/PIK3CA/KIT/KRAS/MAP2K1/PDGFRA/GNAS	7
hsa04934	Cushing syndrome	7/26	155/8157	3.79X10-7	1.96X10-6	7.75X10-7	EGFR/APC/RB1/BRAF/CTNNB1/MAP2K1/GNAS	7
hsa04722	Neurotrophin signaling pathway	6/26	119/8157	1.54X10-6	7.75X10-6	3.06X10-6	TP53/PIK3CA/NTRK1/KRAS/BRAF/MAP2K1	6
hsa05221	Acute myeloid leukemia	5/26	67/8157	1.85X10-6	9.04X10-6	3.57X10-6	PIK3CA/KIT/KRAS/BRAF/MAP2K1	5
hsa04510	Focal adhesion	7/26	201/8157	2.2X10-6	1.04X10-5	4.12X10-6	EGFR/PIK3CA/BRAF/CTNNB1/ERBB2/MAP2K1/PDGFRA	7
hsa04926	Relaxin signaling pathway	6/26	129/8157	2.47X10-6	1.15X10-5	4.52X10-6	EGFR/PIK3CA/NOS3/KRAS/MAP2K1/GNAS	6
hsa05207	Chemical carcinogenesis - receptor activation	7/26	212/8157	3.13X10-6	1.41X10-5	5.58X10-6	EGFR/PIK3CA/ESR1/RB1/KRAS/MAP2K1/GNAS	7
hsa04540	Gap junction	5/26	88/8157	7.17X10-6	3.16X10-5	1.25X10-5	EGFR/KRAS/MAP2K1/PDGFRA/GNAS	5
hsa04211	Longevity regulating pathway	5/26	89/8157	7.58X10-6	3.18X10-5	1.25X10-5	TP53/PIK3CA/SOD2/KRAS/STK11	5
hsa05235	PD-L1 expression and PD-1 checkpoint pathway in cancer	5/26	89/8157	7.58X10-6	3.18X10-5	1.25X10-5	EGFR/PIK3CA/KRAS/MAP2K1/ALK	5
hsa05161	Hepatitis B	6/26	162/8157	9.27X10-6	3.79X10-5	1.5X10-5	TP53/PIK3CA/RB1/KRAS/BRAF/MAP2K1	6
hsa05231	Choline metabolism in cancer	5/26	98/8157	1.22X10-5	4.87X10-5	1.92X10-5	EGFR/PIK3CA/KRAS/MAP2K1/PDGFRA	5
hsa04916	Melanogenesis	5/26	101/8157	1.41X10-5	5.51X10-5	2.18X10-5	KIT/KRAS/CTNNB1/MAP2K1/GNAS	5
hsa04066	HIF-1 signaling pathway	5/26	109/8157	2.04X10-5	7.82X10-5	3.09X10-5	EGFR/PIK3CA/NOS3/ERBB2/MAP2K1	5
hsa05167	Kaposi sarcoma-associated herpesvirus infection	6/26	194/8157	2.59X10-5	9.71X10-5	3.83X10-5	TP53/PIK3CA/RB1/KRAS/CTNNB1/MAP2K1	6
hsa04726	Serotonergic synapse	5/26	115/8157	2.65X10-5	9.72X10-5	3.84X10-5	KRAS/BRAF/CYP2D6/MAP2K1/GNAS	5
hsa04071	Sphingolipid signaling pathway	5/26	119/8157	3.13X10-5	0.000112308	4.43X10-5	TP53/PIK3CA/NOS3/KRAS/MAP2K1	5
hsa04370	VEGF signaling pathway	4/26	59/8157	3.28X10-5	0.000115369	4.55X10-5	PIK3CA/NOS3/KRAS/MAP2K1	4
hsa04730	Long-term depression	4/26	60/8157	3.5X10-5	0.000120924	4.77X10-5	KRAS/BRAF/MAP2K1/GNAS	4
hsa05208	Chemical carcinogenesis - reactive oxygen species	6/26	223/8157	5.68X10-5	0.000192273	7.59X10-5	EGFR/PIK3CA/SOD2/KRAS/BRAF/MAP2K1	6
hsa04210	Apoptosis	5/26	136/8157	5.94X10-5	0.00019725	7.79X10-5	TP53/PIK3CA/NTRK1/KRAS/MAP2K1	5
hsa05211	Renal cell carcinoma	4/26	69/8157	6.09X10-5	0.000198568	7.84X10-5	PIK3CA/KRAS/BRAF/MAP2K1	4
hsa04917	Prolactin signaling pathway	4/26	70/8157	6.45X10-5	0.000206327	8.14X10-5	PIK3CA/ESR1/KRAS/MAP2K1	4
hsa04921	Oxytocin signaling pathway	5/26	154/8157	0.000107301	0.000337233	0.000133118	EGFR/NOS3/KRAS/MAP2K1/GNAS	5
hsa04150	mTOR signaling pathway	5/26	156/8157	0.000114055	0.000346099	0.000136618	PIK3CA/KRAS/BRAF/MAP2K1/STK11	5
hsa04218	Cellular senescence	5/26	156/8157	0.000114055	0.000346099	0.000136618	TP53/PIK3CA/RB1/KRAS/MAP2K1	5
hsa04912	GnRH signaling pathway	4/26	93/8157	0.000195356	0.000582758	0.000230036	EGFR/KRAS/MAP2K1/GNAS	4
hsa04914	Progesterone-mediated oocyte maturation	4/26	102/8157	0.000278853	0.00081797	0.000322883	PIK3CA/KRAS/BRAF/MAP2K1	4
hsa04928	Parathyroid hormone synthesis, secretion and action	4/26	106/8157	0.000323167	0.000932417	0.000368059	EGFR/BRAF/MAP2K1/GNAS	4
hsa04935	Growth hormone synthesis, secretion and action	4/26	119/8157	0.000502253	0.00141959	0.000560366	PIK3CA/KRAS/MAP2K1/GNAS	4
hsa05417	Lipid and atherosclerosis	5/26	215/8157	0.00050815	0.00141959	0.000560366	TP53/PIK3CA/SOD2/NOS3/KRAS	5
hsa05166	Human T-cell leukemia virus 1 infection	5/26	222/8157	0.000588332	0.00161791	0.00063865	TP53/PIK3CA/RB1/KRAS/MAP2K1	5
hsa04650	Natural killer cell mediated cytotoxicity	4/26	131/8157	0.00072209	0.0019552	0.000771788	PIK3CA/KRAS/BRAF/MAP2K1	4
hsa04910	Insulin signaling pathway	4/26	137/8157	0.000854355	0.00227828	0.000899321	PIK3CA/KRAS/BRAF/MAP2K1	4
hsa05418	Fluid shear stress and atherosclerosis	4/26	139/8157	0.000902017	0.00236948	0.00093532	TP53/PIK3CA/NOS3/CTNNB1	4
hsa04140	Autophagy - animal	4/26	141/8157	0.000951532	0.00244842	0.00096648	PIK3CA/KRAS/MAP2K1/STK11	4
hsa04213	Longevity regulating pathway - multiple species	3/26	62/8157	0.000959891	0.00244842	0.00096648	PIK3CA/SOD2/KRAS	3
hsa05217	Basal cell carcinoma	3/26	63/8157	0.00100576	0.00252877	0.000998197	TP53/APC/CTNNB1	3
hsa04929	GnRH secretion	3/26	64/8157	0.001053	0.00261024	0.00103036	PIK3CA/KRAS/MAP2K1	3
hsa05010	Alzheimer disease	6/26	384/8157	0.00107929	0.00263826	0.00104142	PIK3CA/APC/KRAS/BRAF/CTNNB1/MAP2K1	6
hsa04720	Long-term potentiation	3/26	67/8157	0.00120308	0.00290058	0.00114497	KRAS/BRAF/MAP2K1	3
hsa04664	Fc epsilon RI signaling pathway	3/26	68/8157	0.00125596	0.00298714	0.00117913	PIK3CA/KRAS/MAP2K1	3
hsa04520	Adherens junction	3/26	71/8157	0.00142332	0.00334005	0.00131844	EGFR/CTNNB1/ERBB2	3
hsa01524	Platinum drug resistance	3/26	73/8157	0.00154233	0.0035717	0.00140988	TP53/PIK3CA/ERBB2	3
hsa04662	B cell receptor signaling pathway	3/26	82/8157	0.00215478	0.00492521	0.00194416	PIK3CA/KRAS/MAP2K1	3
hsa05034	Alcoholism	4/26	187/8157	0.00269346	0.00607755	0.00239903	KRAS/BRAF/MAP2K1/GNAS	4
hsa04062	Chemokine signaling pathway	4/26	192/8157	0.0029636	0.00658185	0.0025981	PIK3CA/KRAS/BRAF/MAP2K1	4
hsa05222	Small cell lung cancer	3/26	92/8157	0.00299175	0.00658185	0.0025981	TP53/PIK3CA/RB1	3
hsa04750	Inflammatory mediator regulation of TRP channels	3/26	98/8157	0.00357791	0.00777422	0.00306877	PIK3CA/NTRK1/GNAS	3
hsa05203	Viral carcinogenesis	4/26	204/8157	0.00368697	0.00791349	0.00312375	TP53/PIK3CA/RB1/KRAS	4
hsa04933	AGE-RAGE signaling pathway in diabetic complications	3/26	100/8157	0.00378783	0.00803202	0.00317053	PIK3CA/NOS3/KRAS	3
hsa04660	T cell receptor signaling pathway	3/26	104/8157	0.00422998	0.00886282	0.00349848	PIK3CA/KRAS/MAP2K1	3
hsa04024	cAMP signaling pathway	4/26	221/8157	0.00490615	0.0101586	0.00400998	PIK3CA/BRAF/MAP2K1/GNAS	4
hsa04725	Cholinergic synapse	3/26	113/8157	0.00533645	0.0109211	0.00431097	PIK3CA/KRAS/MAP2K1	3
hsa04960	Aldosterone-regulated sodium reabsorption	2/26	37/8157	0.00607585	0.0122914	0.00485186	PIK3CA/KRAS	2
hsa04611	Platelet activation	3/26	124/8157	0.00690655	0.0138131	0.00545254	PIK3CA/NOS3/GNAS	3
hsa04144	Endocytosis	4/26	251/8157	0.00767557	0.0151787	0.00599158	EGFR/FGFR2/FGFR3/PDGFRA	4
hsa04270	Vascular smooth muscle contraction	3/26	134/8157	0.00855	0.01672	0.0066	BRAF/MAP2K1/GNAS	3
hsa04371	Apelin signaling pathway	3/26	139/8157	0.00945111	0.0182791	0.00721542	NOS3/KRAS/MAP2K1	3
hsa04961	Endocrine and other factor-regulated calcium reabsorption	2/26	53/8157	0.012185	0.0233105	0.00920152	ESR1/GNAS	2
hsa04923	Regulation of lipolysis in adipocytes	2/26	56/8157	0.0135382	0.0256207	0.0101134	PIK3CA/GNAS	2
hsa04630	JAK-STAT signaling pathway	3/26	162/8157	0.0143	0.0267746	0.0105689	EGFR/PIK3CA/PDGFRA	3
hsa05022	Pathways of neurodegeneration - multiple diseases	5/26	476/8157	0.0157203	0.029124	0.0114963	APC/KRAS/BRAF/CTNNB1/MAP2K1	5
hsa04310	Wnt signaling pathway	3/26	170/8157	0.016264	0.0298173	0.01177	TP53/APC/CTNNB1	3
hsa04137	Mitophagy - animal	2/26	72/8157	0.0217815	0.0395211	0.0156004	TP53/KRAS	2
hsa05100	Bacterial invasion of epithelial cells	2/26	77/8157	0.0246937	0.0443479	0.0175058	PIK3CA/CTNNB1	2
hsa05169	Epstein-Barr virus infection	3/26	202/8157	0.025587	0.0454881	0.0179558	TP53/PIK3CA/RB1	3
hsa00983	Drug metabolism - other enzymes	2/26	80/8157	0.0265138	0.0466643	0.0184201	TPMT/DPYD	2
C, Functional terms enriched in GO analysis of all somatic mutated genes in the Hyp group (n=16)
ID	Description	GeneRatio	BgRatio	P-value	p.adjust	q-value	Gene ID	Count
GO:0004714	transmembrane receptor protein tyrosine kinase activity	5/14	61/18352	6.71X10-10	6.51X10-8	3.6X10-8	EGFR/ERBB2/RET/ALK/FGFR3	5
GO:0019199	transmembrane receptor protein kinase activity	5/14	80/18352	2.69X10-9	1.31X10-7	7.23X10-8	EGFR/ERBB2/RET/ALK/FGFR3	5
GO:0004713	protein tyrosine kinase activity	5/14	135/18352	3.8X10-8	1.23X10-6	6.79X10-7	EGFR/ERBB2/RET/ALK/FGFR3	5
GO:0031625	ubiquitin protein ligase binding	4/14	297/18352	5.92X10-5	0.00143568	0.000794571	EGFR/TP53/FBXW7/APC	4
GO:0044389	ubiquitin-like protein ligase binding	4/14	316/18352	7.53X10-5	0.00146142	0.000808815	EGFR/TP53/FBXW7/APC	4
GO:0019838	growth factor binding	3/14	136/18352	0.00013649	0.00220659	0.00122123	EGFR/ERBB2/FGFR3	3
GO:0019903	protein phosphatase binding	3/14	149/18352	0.000178791	0.00247753	0.00137118	EGFR/TP53/ERBB2	3
GO:0019902	phosphatase binding	3/14	194/18352	0.000388536	0.004711	0.00260728	EGFR/TP53/ERBB2	3
D, Functional terms enriched in GO analysis of all somatic mutated genes in the non-Hyp group (n=48)
ID	Description	GeneRatio	BgRatio	P-value	p.adjust	q-value	Gene ID	Count
GO:0004714	transmembrane receptor protein tyrosine kinase activity	9/26	61/18352	7.99X10-17	1.24X10-14	6.22X10-15	EGFR/KIT/FGFR2/NTRK1/FGFR3/ERBB2/PDGFRA/RET/ALK	9
GO:0019199	transmembrane receptor protein kinase activity	9/26	80/18352	1.05X10-15	8.15X10-14	4.1X10-14	EGFR/KIT/FGFR2/NTRK1/FGFR3/ERBB2/PDGFRA/RET/ALK	9
GO:0004713	protein tyrosine kinase activity	10/26	135/18352	1.59X10-15	8.21X10-14	4.13X10-14	EGFR/KIT/FGFR2/NTRK1/FGFR3/ERBB2/MAP2K1/PDGFRA/RET/ALK	10
GO:0019838	growth factor binding	6/26	136/18352	3.02X10-8	1.17X10-6	5.88X10-7	EGFR/FGFR2/NTRK1/FGFR3/ERBB2/PDGFRA	6
GO:0097718	disordered domain specific binding	3/26	36/18352	1.75X10-5	0.000541664	0.000272211	TP53/RB1/CTNNB1	3
GO:0019903	protein phosphatase binding	4/26	149/18352	5.43X10-5	0.00140247	0.000704806	EGFR/TP53/CTNNB1/ERBB2	4
GO:0097110	scaffold protein binding	3/26	60/18352	8.19X10-5	0.00181296	0.000911098	NOS3/BRAF/MAP2K1	3
GO:0019887	protein kinase regulator activity	4/26	185/18352	0.000125629	0.00243407	0.00122323	PIK3CA/APC/MAP2K1/STK11	4
GO:0019902	phosphatase binding	4/26	194/18352	0.000150841	0.00259782	0.00130552	EGFR/TP53/CTNNB1/ERBB2	4
GO:0030295	protein kinase activator activity	3/26	82/18352	0.000207557	0.00292746	0.00147118	PIK3CA/MAP2K1/STK11	3
GO:0019207	kinase regulator activity	4/26	216/18352	0.000227685	0.00292746	0.00147118	PIK3CA/APC/MAP2K1/STK11	4
GO:0008013	beta-catenin binding	3/26	85/18352	0.000230835	0.00292746	0.00147118	ESR1/APC/CTNNB1	3
GO:0030275	LRR domain binding	2/26	17/18352	0.000259077	0.00292746	0.00147118	KRAS/STK11	2
GO:0019209	kinase activator activity	3/26	89/18352	0.000264415	0.00292746	0.00147118	PIK3CA/MAP2K1/STK11	3
GO:0004674	protein serine/threonine kinase activity	5/26	435/18352	0.000318736	0.00315022	0.00158313	EGFR/PIK3CA/BRAF/MAP2K1/STK11	5
GO:0001091	RNA polymerase II general transcription initiation factor binding	2/26	19/18352	0.000325184	0.00315022	0.00158313	TP53/ESR1	2
GO:0017134	fibroblast growth factor binding	2/26	23/18352	0.000479447	0.00437143	0.00219685	FGFR2/FGFR3	2
GO:0031625	ubiquitin protein ligase binding	4/26	297/18352	0.000758709	0.00653333	0.0032833	EGFR/TP53/APC/RB1	4
GO:0044389	ubiquitin-like protein ligase binding	4/26	316/18352	0.000955878	0.00779795	0.00391883	EGFR/TP53/APC/RB1	4
GO:0030331	estrogen receptor binding	2/26	42/18352	0.00160487	0.0124377	0.00625055	ESR1/CTNNB1	2
GO:0140296	general transcription initiation factor binding	2/26	44/18352	0.00176024	0.0129923	0.00652922	TP53/ESR1	2
GO:0051427	hormone receptor binding	3/26	177/18352	0.00194791	0.01352	0.00679445	ESR1/CTNNB1/GNAS	3
GO:0001102	RNA polymerase II activating transcription factor binding	2/26	47/18352	0.0020062	0.01352	0.00679445	RB1/CTNNB1	2
GO:0008022	protein C-terminus binding	3/26	189/18352	0.0023476	0.0151616	0.0076194	CTNNB1/ERBB2/MAP2K1	3
GO:0050661	NADP binding	2/26	54/18352	0.00263964	0.0163658	0.00822456	NOS3/DPYD	2
GO:0001085	RNA polymerase II transcription factor binding	2/26	56/18352	0.00283577	0.0169055	0.00849583	TP53/CTNNB1	2
GO:0002039	p53 binding	2/26	66/18352	0.00391565	0.0224788	0.0112966	TP53/STK11	2
GO:0001098	basal transcription machinery binding	2/26	72/18352	0.00464168	0.024809	0.0124677	TP53/ESR1	2
GO:0001099	basal RNA polymerase II transcription machinery binding	2/26	72/18352	0.00464168	0.024809	0.0124677	TP53/ESR1	2
GO:0033613	activating transcription factor binding	2/26	80/18352	0.00569884	0.028278	0.014211	RB1/CTNNB1	2
GO:0035258	steroid hormone receptor binding	2/26	81/18352	0.00583805	0.028278	0.014211	ESR1/CTNNB1	2
GO:0050660	flavin adenine dinucleotide binding	2/26	81/18352	0.00583805	0.028278	0.014211	NOS3/DPYD	2
GO:0061629	RNA polymerase II-specific DNA-binding transcription factor binding	3/26	267/18352	0.00618153	0.0290345	0.0145912	ESR1/RB1/CTNNB1	3
GO:0051117	ATPase binding	2/26	88/18352	0.00685579	0.0312544	0.0157068	EGFR/ESR1	2
GO:0004497	monooxygenase activity	2/26	101/18352	0.00894301	0.0385046	0.0193504	NOS3/CYP2D6	2
GO:0016922	nuclear receptor binding	2/26	101/18352	0.00894301	0.0385046	0.0193504	ESR1/CTNNB1	2
GO:0047485	protein N-terminus binding	2/26	107/18352	0.00999069	0.0418529	0.021033	TP53/MAP2K1	2
BgRatio, Background Ratio; GO, Gene Ontology; Hyp group, hypertension group; KEGG, Kyoto Encyclopedia of Genes and Genomes; non-Hyp group, non-hypertension group; p.adjust, adjusted P-value.
